# Supplementary material
Source: PubMed Central journal article supplement (PMC3224179)
Supplement: NIHMS328839-supplement-01.pdf [file NIHMS328839-supplement-01.pdf]

## Symmetry breaking and the establishment of cell polarity in budding yeast: Supplementary Information

Jayme M. Johnson <sup>a</sup>, Meng Jin<sup>b</sup>, and Daniel J. Lew<sup>a\*</sup>

Simulations were performed using MATLAB, on a model cell with 2D plasma membrane corresponding to a 5  $\mu\text{m}$  diameter sphere (Figures 1 & 2) or 1D cell perimeter corresponding to a 5  $\mu\text{m}$  diameter circle (Figure 3). All membrane-bound species have the same slow diffusion coefficient  $D_m$  and all cytosolic species have the same fast diffusion coefficient  $D_c$ . The cell dimensions, total Cdc42, total Bem1 complex, and (for Figures 2 & 3) total GDI are all constant. The ratio of membrane volume to cytoplasmic volume is indicated by  $\eta$ .

### Model with Cdc42 and Bem1 complex:

For Figure 1, we model how the concentrations of the following five molecular species vary with time, as a result of reactions and diffusion:

GTP-Cdc42 (Cdc42T), GDP-Cdc42 (Cdc42D), Bem1 complex (Bem1GEF<sub>m</sub> on the membrane, Bem1GEF<sub>c</sub> in the cytoplasm), and Bem1 complex bound to GTP-Cdc42 (Bem1GEF<sub>m</sub>Cdc42T).

Model parameters are listed in Table S1. This model is described by the following equations (as in Goryachev and Pokhilko 2008 but without the GDI):

$$\begin{aligned} \frac{\partial Cdc42D}{\partial t} &= D_m \nabla^2 Cdc42D - Cdc42D(k_2 Bem1GEF_m + k_{2p} Bem1GEF_m Cdc42T) + k_{2r} Cdc42T \\ \frac{\partial Cdc42T}{\partial t} &= D_m \nabla^2 Cdc42T + Cdc42D(k_2 Bem1GEF_m + k_{2p} Bem1GEF_m Cdc42T) - k_{2r} Cdc42T \\ &\quad - (k_4 Bem1GEF_c + k_5 Bem1GEF_m) Cdc42T + k_{5r} Bem1GEF_m Cdc42T \\ \frac{\partial Bem1GEF_m Cdc42T}{\partial t} &= D_m \nabla^2 Bem1GEF_m Cdc42T \\ &\quad + (k_4 Bem1GEF_c + k_5 Bem1GEF_m) Cdc42T - k_{5r} Bem1GEF_m Cdc42T \\ \frac{\partial Bem1GEF_c}{\partial t} &= D_c \nabla^2 Bem1GEF_c + \eta(-k_3 Bem1GEF_c + k_{3r} Bem1GEF_m - k_4 Bem1GEF_c) Cdc42T \\ \frac{\partial Bem1GEF_m}{\partial t} &= D_m \nabla^2 Bem1GEF_m + k_3 Bem1GEF_c - k_{3r} Bem1GEF_m \\ &\quad - k_5 Bem1GEF_m \cdot Cdc42T + k_{5r} Bem1GEF_m Cdc42T \end{aligned}$$

This model includes the following assumptions:

(i) Cdc42 is always on the membrane.

(ii) The Bem1 complex exchanges between membrane and cytoplasm. Both forms can bind GTP-Cdc42, and while bound the full complex stays on the membrane. Cdc42 does not undergo GTP hydrolysis while the Bem1 complex is bound.

(iii) Cdc42 GDP/GTP exchange is catalyzed by the Bem1 complex at the membrane. GEF-catalyzed exchange occurs by mass action (i.e. GEF activity never approaches saturation).

(iv) GAP activity is spatially uniform, and is incorporated in the first-order hydrolysis rate constant  $k_{2r}$ .

To successfully cluster GTP-Cdc42 by this mechanism, it is critical that total Bem1 complex abundance is low and membrane diffusion is slow. We modeled a scenario in which the GEF activity of the Bem1 complex is stimulated 20-fold upon binding to GTP-Cdc42, but this is not essential (increasing the basal GEF simply makes the cluster of GTP-Cdc42 larger).

### Model with GDI as well as Cdc42 and Bem1 complex:

For Figures 2 & 3, we add the following three molecular species:

Free GDI in the cytoplasm ( $I_c$ ), GDI bound to GDP-Cdc42 in the cytoplasm ( $Cdc42I_c$ ), and GDI bound to GDP-Cdc42 on the membrane ( $Cdc42I_m$ ).

Model parameters are listed in Table S1. This model is described by the following equations:

$$\frac{\partial Cdc42I_c}{\partial t} = D_c \nabla^2 Cdc42I_c + \eta(-k_1 Cdc42I_c + k_{1r} Cdc42I_m)$$

$$\frac{\partial Cdc42I_m}{\partial t} = D_m \nabla^2 Cdc42I_m + k_1 Cdc42I_c - k_{1r} Cdc42I_m + k_6 Cdc42D \cdot I_c - k_{6r} Cdc42I_m$$

$$\frac{\partial I_c}{\partial t} = D_c \nabla^2 I_c + \eta(-k_6 Cdc42 \cdot I_c + k_{6r} Cdc42I_m)$$

$$\begin{aligned} \frac{\partial Cdc42D}{\partial t} = & D_m \nabla^2 Cdc42D - k_6 Cdc42D \cdot I_c + k_{6r} Cdc42I_m \\ & - Cdc42D(k_2 Bem1GEF_m + k_{2p} Bem1GEF_m Cdc42T) + k_{2r} Cdc42T \end{aligned}$$

$$\begin{aligned} \frac{\partial Cdc42T}{\partial t} = & D_m \nabla^2 Cdc42T + Cdc42D(k_2 Bem1GEF_m + k_{2p} Bem1GEF_m Cdc42T) - k_{2r} Cdc42T \\ & - (k_4 Bem1GEF_c + k_5 Bem1GEF_m) Cdc42T + k_{5r} Bem1GEF_m Cdc42T \end{aligned}$$

$$\begin{aligned} \frac{\partial Bem1GEF_m Cdc42T}{\partial t} = & D_m \nabla^2 Bem1GEF_m Cdc42T \\ & + (k_4 Bem1GEF_c + k_5 Bem1GEF_m) Cdc42T - k_{5r} Bem1GEF_m Cdc42T \end{aligned}$$

$$\frac{\partial Bem1GEF_c}{\partial t} = D_c \nabla^2 Bem1GEF_c + \eta(-k_3 Bem1GEF_c + k_{3r} Bem1GEF_m - k_4 Bem1GEF_c) Cdc42T$$

$$\begin{aligned} \frac{\partial Bem1GEF_m}{\partial t} = & D_m \nabla^2 Bem1GEF_m + k_3 Bem1GEF_c - k_{3r} Bem1GEF_m \\ & - k_5 Bem1GEF_m \cdot Cdc42T + k_{5r} Bem1GEF_m Cdc42T \end{aligned}$$

This model, which is identical to that of Goryachev and Pokhilko (2008) but with parameters adjusted according to Howell et al. (2009), includes the following additional assumptions:

(i) Cytoplasmic GDI can bind GDP-Cdc42 but not GTP-Cdc42, to generate an initially membrane-bound Cdc42-GDI complex that can then exchange between membrane and cytoplasm.

(ii) Cdc42 cannot exchange GDP for GTP while bound to GDI.

(iii) Membrane-bound Cdc42-GDI complex can dissociate to yield GDP-Cdc42p on the membrane and GDI in the cytoplasm.

The 1D simulations in Figure 3 are conducted on a line with periodic boundary condition, starting with Gaussian peaks of GTP-Cdc42. For competition, two peaks containing GTP-Cdc42 at a ratio of 55:45 were initiated at opposite ends of the cell (0.25L and 0.75L). For merging, two identical peaks were initiated at 0.25L and 0.625L.

**Table S1: parameter values used in simulations**

| Parameter                                               | Figure 1                            | Figures 2 & 3                        |
|---------------------------------------------------------|-------------------------------------|--------------------------------------|
| $k_1$ (Cdc42-GDI complex: cytosol to membrane)          | -                                   | $0.9 \text{ s}^{-1}$                 |
| $k_{1r}$ (Cdc42-GDI complex: membrane to cytosol)       | -                                   | $0.13 \text{ s}^{-1}$                |
| $k_6$ (Cdc42-GDI association)                           | -                                   | $1.5 \mu\text{M}^{-1}\text{s}^{-1}$  |
| $k_{6r}$ (Cdc42-GDI dissociation)                       | -                                   | $0.5 \text{ s}^{-1}$                 |
| $k_2$ (GEF activity of Bem1 complex)                    | $0.2 \mu\text{M}^{-1}\text{s}^{-1}$ | $0.16 \mu\text{M}^{-1}\text{s}^{-1}$ |
| $k_{2p}$ (GEF activity of Bem1 complex bound to Cdc42)  | $10 \mu\text{M}^{-1}\text{s}^{-1}$  | $0.35 \mu\text{M}^{-1}\text{s}^{-1}$ |
| $k_{2r}$ (constitutive GAP activity)                    | $5 \text{ s}^{-1}$                  | $0.32 \text{ s}^{-1}$                |
| $k_3$ (Bem1 complex: cytosol to membrane)               | $1 \text{ s}^{-1}$                  | $10 \text{ s}^{-1}$                  |
| $k_{3r}$ (Bem1 complex: membrane to cytosol)            | $1 \text{ s}^{-1}$                  | $10 \text{ s}^{-1}$                  |
| $k_4$ and $k_5$ (Bem1 complex-Cdc42 association)        | $1 \mu\text{M}^{-1}\text{s}^{-1}$   | $10 \mu\text{M}^{-1}\text{s}^{-1}$   |
| $k_{5r}$ (Bem1 complex-Cdc42 dissociation)              | $2 \text{ s}^{-1}$                  | $10 \text{ s}^{-1}$                  |
| $\eta$ (ratio of membrane volume to cytoplasmic volume) | 0.01                                | 0.01                                 |
| $D_c$ (cytoplasmic diffusion)                           | $10 \mu\text{m}^2\text{s}^{-1}$     | $10 \mu\text{m}^2\text{s}^{-1}$      |
| $D_m$ (membrane diffusion)                              | $0.01 \mu\text{m}^2\text{s}^{-1}$   | $0.036 \mu\text{m}^2\text{s}^{-1}$   |
| Total Cdc42 on membrane (Fig1)/ in a cell (Fig 2, 3)    | 25 $\mu\text{M}$                    | 5 $\mu\text{M}$                      |
| Total Bem1 complex in a cell                            | 0.0075 $\mu\text{M}$                | 0.017 $\mu\text{M}$                  |
| Total GDI in a cell                                     | -                                   | 5 $\mu\text{M}$                      |
